# Supplementary material for: The effect of headgroup methylation on polymorphic phase behaviour in hydrated N-methylated phosphoethanolamine:palmitic acid membranes
Source: Royal Society of Chemistry journal article supplement (doi:10.1039/d1sm00178g), 2021-01-01
Supplement: d1sm00178g1.pdf [file d1sm00178g1.pdf]

### Supplementary information

The effect of headgroup methylation on polymorphic phase behaviour in hydrated N-methylated phosphoethanolamine: palmitic acid membranes

Matthew Allen, Yuval Elani, Nicholas J. Brooks, and John M. Seddon\*

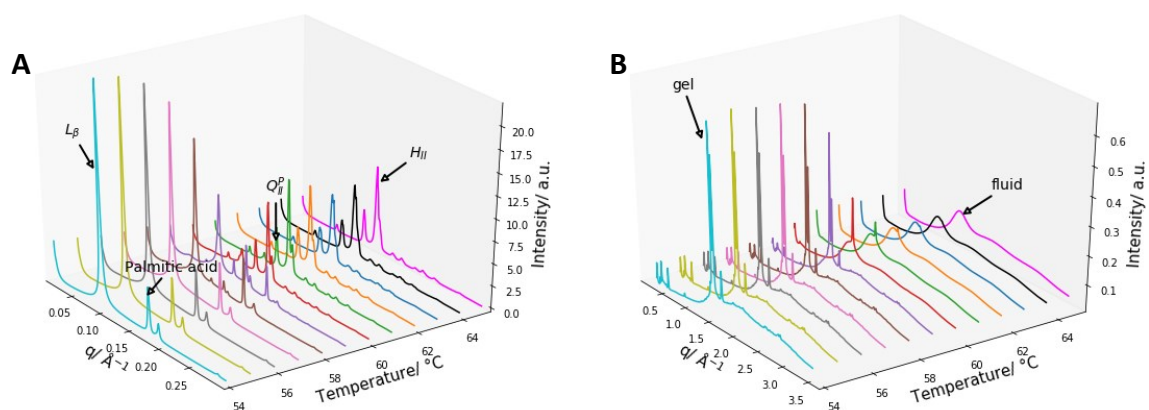

**Figure S1:** X-ray diffraction data of 3:1 PA: DPPE-me mixtures **A:** SAXS patterns from 54 to 65°C with identification of the main liquid-crystalline phase peaks and excess palmitic acid precipitate. **B:** WAXS patterns from 54 to 65°C with indication of the gel and fluid phases.

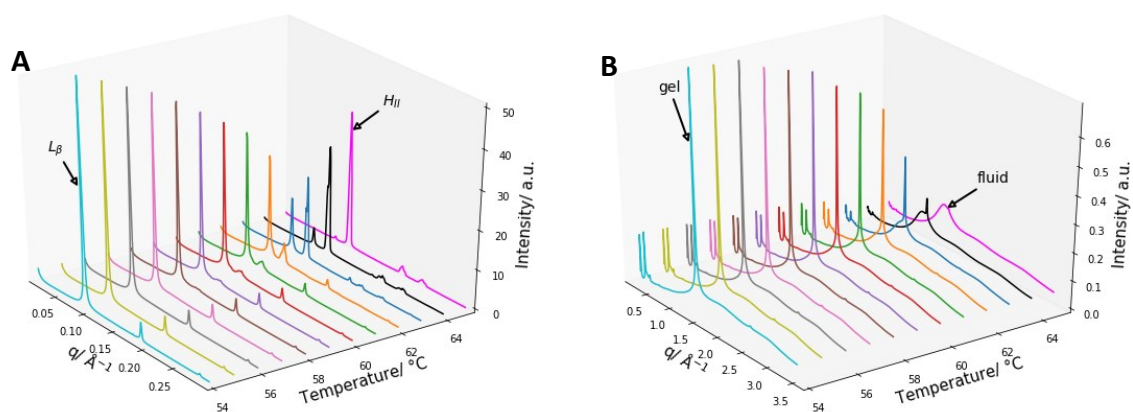

**Figure S2:** X-ray diffraction data of 1:1 PA: DPPE-me mixtures **A:** SAXS patterns from 54 to 65°C with identification of the main liquid-crystalline phase peaks. **B:** WAXS patterns from 54 to 65°C with indication of the gel and fluid phases.

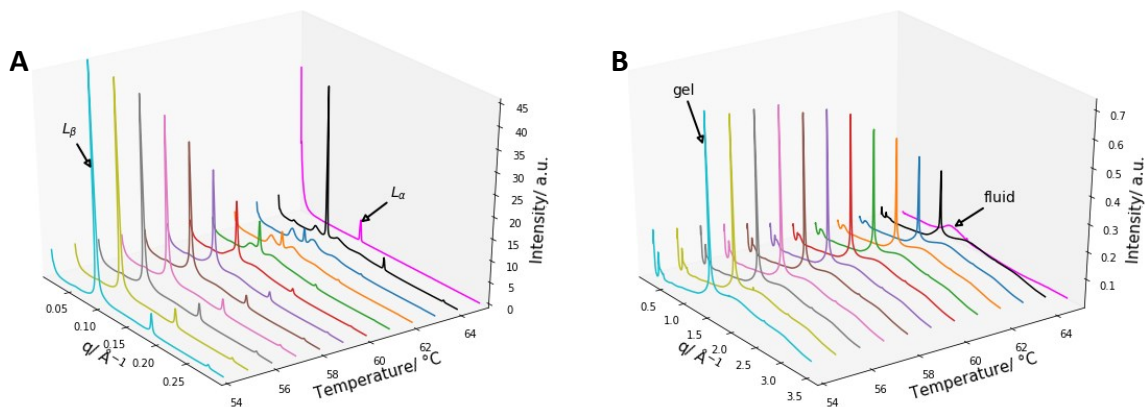

**Figure S3:** X-ray diffraction data of 0.5:1 PA: DPPE-me mixtures **A:** SAXS patterns from 54 to 65 $^{\circ}\text{C}$  with identification of the main liquid-crystalline phase peaks. Higher order  $L_{\alpha}$  peaks are present, however due to their low intensities are not visible on this scale. **B:** WAXS patterns from 54 to 65 $^{\circ}\text{C}$  with indication of the gel and fluid phases.

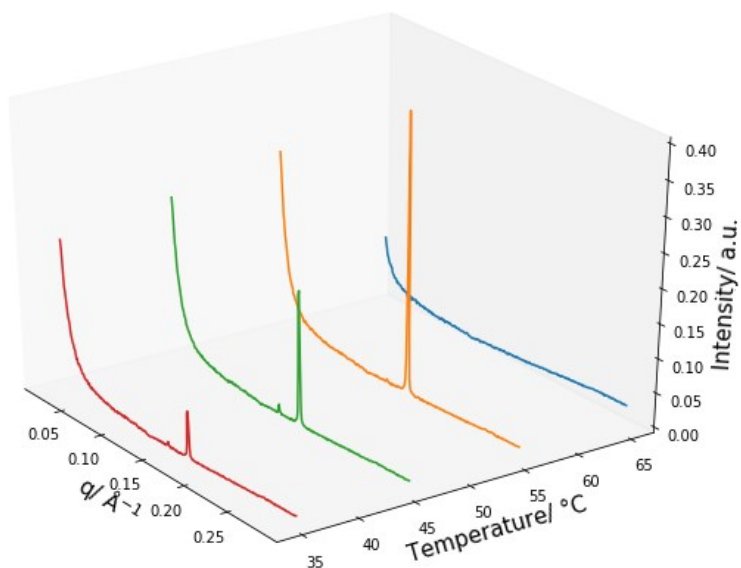

**Figure S4:** Pure hydrated palmitic acid SAXS patterns from 35 to 65 $^{\circ}\text{C}$ . The palmitic acid peaks disappear at temperatures above the melting point due to palmitic acid melting into an isotropic liquid.

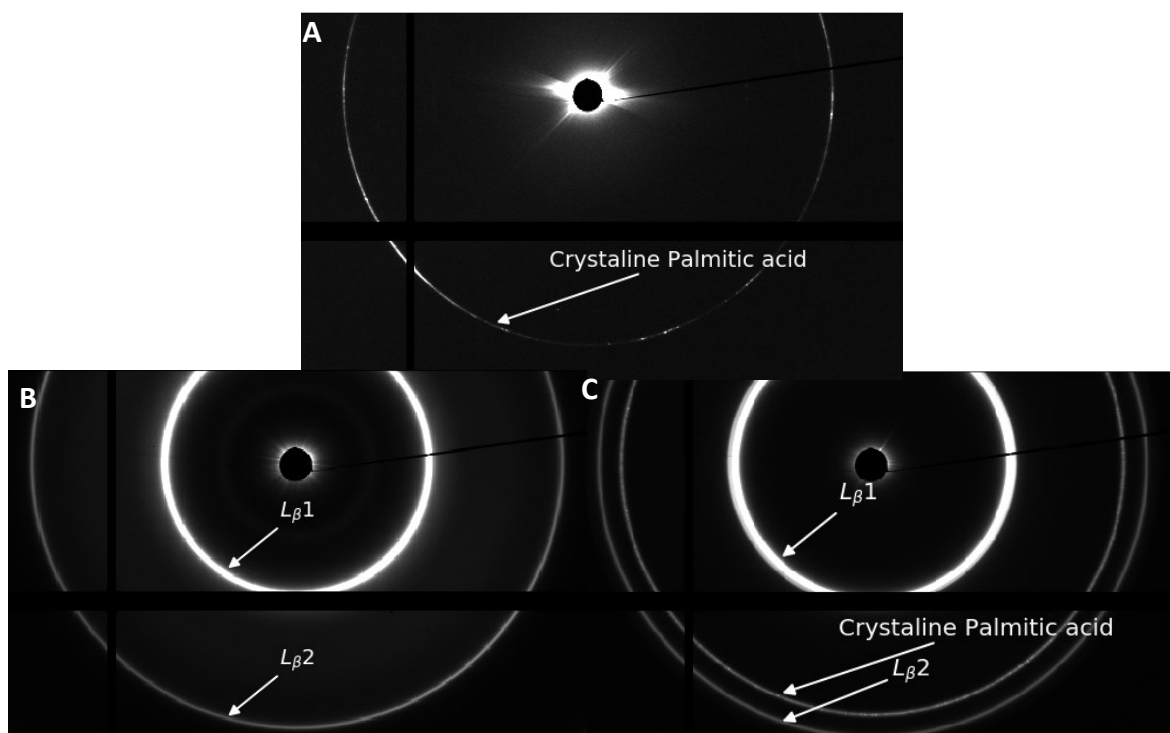

**Figure S5:** 2D diffraction patterns of (A) pure Palmitic acid, (B) 0.5:1 PA:DPPE-me, and (C) 2:1 PA:DPPE-me at 55°C. The extra diffraction ring within the 2:1 PA:DPPE-me pattern when compared to the 0.5:1 PA:DPPE-me sample has the same characteristic bright spots as the diffraction ring for the pure palmitic acid sample.

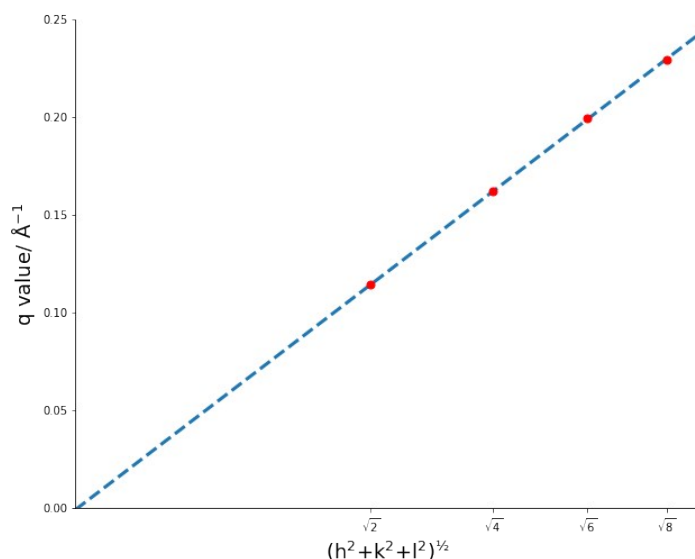

**Figure S6:** Plot of lattice reflection  $q$  values against the Bragg ratios for an  $Im\bar{3}m$  inverse bicontinuous cubic phase in 2:1 PA: DPPE-me. The high quality of the linear fit passing through (0,0) indicates that this is a correct phase assignment. The lattice parameter for this phase was obtained by  $a = \frac{2\pi}{m}$  where  $m$  is the value of the gradient. N.B the same type of plots and fitting process was used to obtain  $d$  spacing values for the  $L_\beta$  and  $H_{II}$  phases.

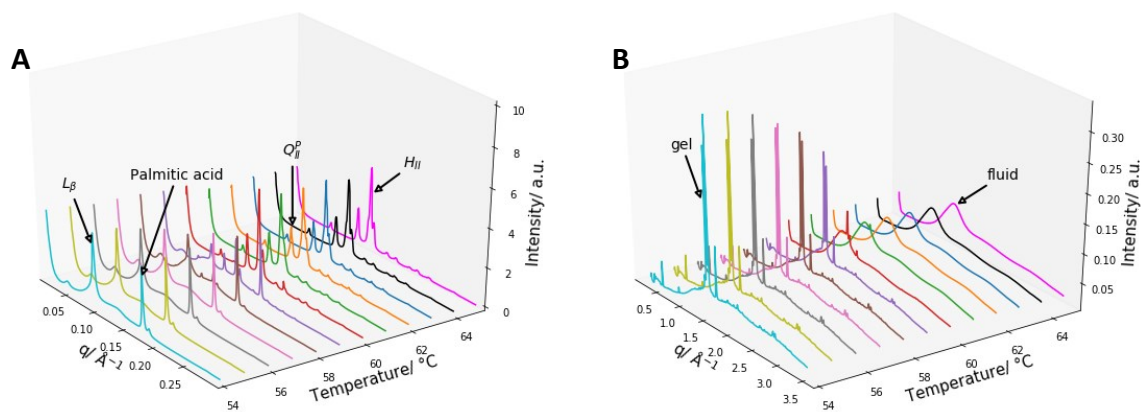

**Figure S7:** X-ray diffraction data of 3:1 PA: DPPE- $me_2$  mixtures **A:** SAXS patterns from 54 to 65°C with identification of the main liquid-crystalline phase peaks and the palmitic acid precipitate. **B:** WAXS patterns from 54 to 65°C with indication of the gel and fluid phases.

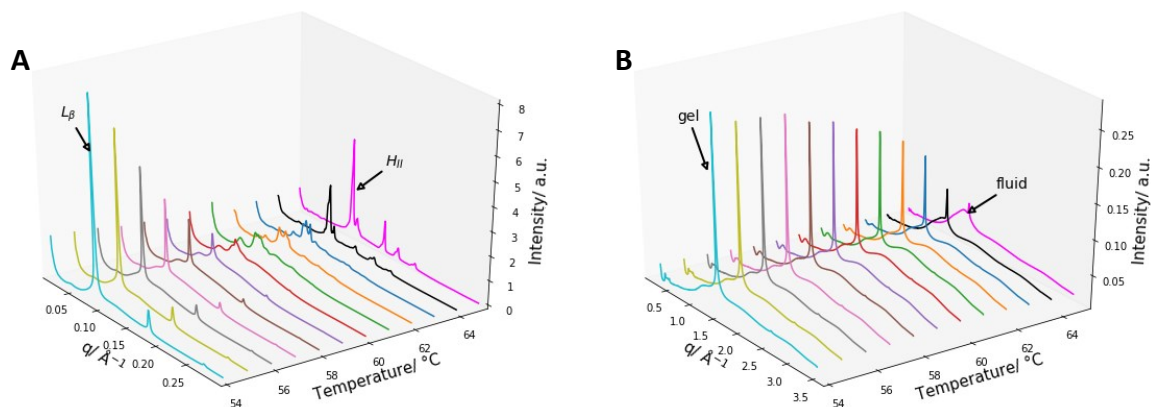

**Figure S8:** X-ray diffraction data of 1:1 PA: DPPE- $me_2$  mixtures. **A:** SAXS patterns from 54 to 65°C with identification of the main liquid-crystalline phase peaks. At 65°C there is a suggestion of an  $Im3m$  phase with peaks at  $0.108 (\sqrt{2})$  and  $0.153 (\sqrt{4})$ ; however there is too little evidence to reliably assign this phase. **B:** WAXS patterns from 54 to 65°C with characteristic indications of the gel and fluid phases.

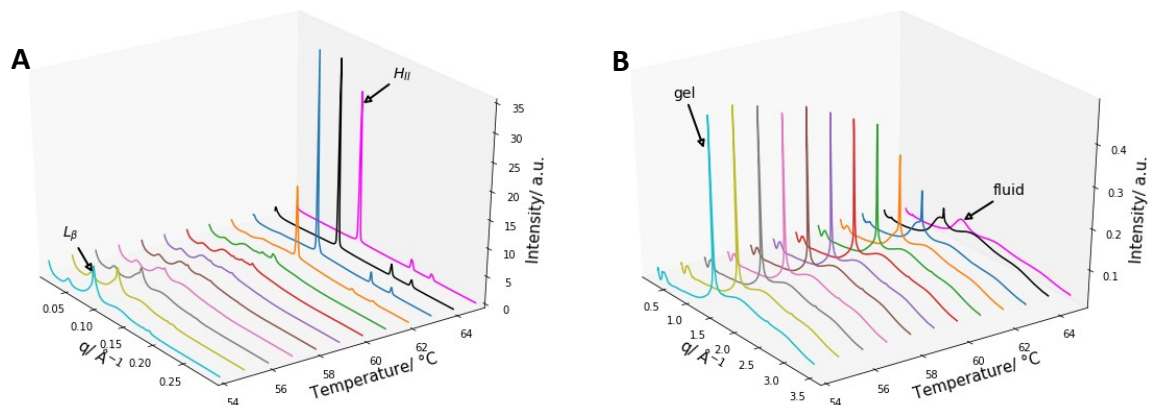

**Figure S9:** X-ray diffraction data of 0.5:1 PA: DPPE-me<sub>2</sub> mixtures. **A:** SAXS patterns from 54 to 65°C with identification of the main liquid-crystalline phase peaks. **B:** WAXS patterns from 54 to 65°C with indication of the gel and fluid phases.

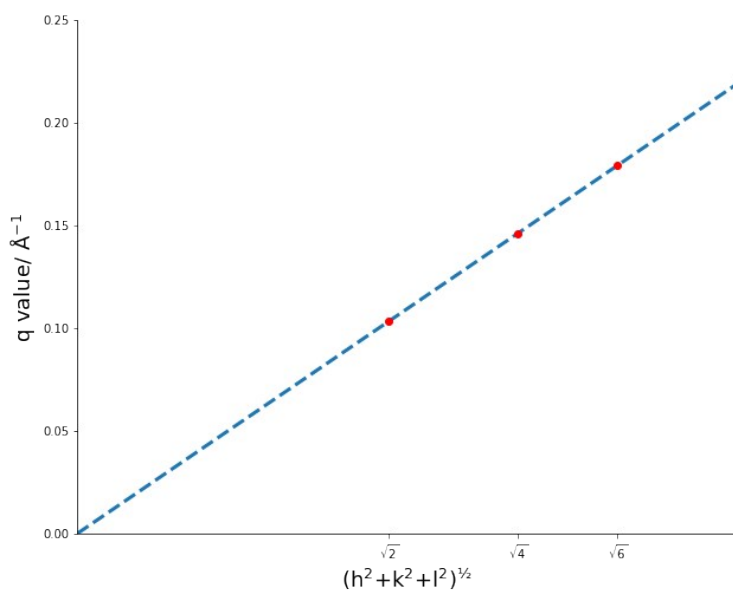

**Figure S10:** Plot of lattice reflection  $q$ -values against the Bragg ratios for an Im3m inverse bicontinuous cubic phase in 2:1 PA: DPPE-me<sub>2</sub>. The high quality of the linear fit passing through the origin suggests that this is a correct phase assignment. The lattice parameter for this phase was

obtained by  $a = \frac{2\pi}{m}$  where  $m$  is the value of the gradient. N.B the same plots and fitting process was used to obtain  $d$  spacing values for the  $L_{\beta}$  and  $H_{II}$  phases.
